# Supplementary material for: The Mediation Role of Sleep Disturbances between Vitamin D and Depressive Symptoms: A Cross-Sectional Study
Source: MDPI journal article supplement (doi:10.3390/brainsci13111501), 2023-10-24
Supplement: s1 [file s1]

## Mediation

### Indirect and Total Effects

| Type      | Effect                                               | Estimate | SE      | 95% C.I. (a) |          | $\beta$  | z      | p      |
|-----------|------------------------------------------------------|----------|---------|--------------|----------|----------|--------|--------|
|           |                                                      |          |         | Lower        | Upper    |          |        |        |
| Indirect  | VitD3 $\Rightarrow$ P3 $\Rightarrow$ PHQ-8 sum score | -0.03495 | 0.01618 | -0.06862     | -0.00478 | -0.04892 | -2.161 | 0.031  |
|           | sex1 $\Rightarrow$ P3 $\Rightarrow$ PHQ-8 sum score  | 0.30226  | 0.24262 | -0.17122     | 0.79591  | 0.02657  | 1.246  | 0.213  |
|           | age $\Rightarrow$ P3 $\Rightarrow$ PHQ-8 sum score   | 0.00909  | 0.01685 | -0.02445     | 0.04280  | 0.00974  | 0.540  | 0.589  |
|           | BMI $\Rightarrow$ P3 $\Rightarrow$ PHQ-8 sum score   | 0.03168  | 0.03573 | -0.04042     | 0.09997  | 0.01952  | 0.887  | 0.375  |
| Component | VitD3 $\Rightarrow$ P3                               | -0.01613 | 0.00706 | -0.02993     | -0.00212 | -0.12144 | -2.285 | 0.022  |
|           | P3 $\Rightarrow$ PHQ-8 sum score                     | 2.16708  | 0.25901 | 1.69071      | 2.69402  | 0.40280  | 8.367  | < .001 |
|           | sex1 $\Rightarrow$ P3                                | 0.13948  | 0.10986 | -0.07599     | 0.35231  | 0.06597  | 1.270  | 0.204  |
|           | age $\Rightarrow$ P3                                 | 0.00420  | 0.00764 | -0.01090     | 0.01888  | 0.02417  | 0.549  | 0.583  |
|           | BMI $\Rightarrow$ P3                                 | 0.01462  | 0.01629 | -0.01822     | 0.04554  | 0.04845  | 0.898  | 0.369  |
| Direct    | VitD3 $\Rightarrow$ PHQ-8 sum score                  | -0.05936 | 0.03442 | -0.12748     | 0.00673  | -0.08308 | -1.725 | 0.085  |
|           | sex1 $\Rightarrow$ PHQ-8 sum score                   | -0.73800 | 0.51373 | -1.75458     | 0.29034  | -0.06488 | -1.437 | 0.151  |
|           | age $\Rightarrow$ PHQ-8 sum score                    | 0.08178  | 0.03964 | 0.00267      | 0.15597  | 0.08756  | 2.063  | 0.039  |
|           | BMI $\Rightarrow$ PHQ-8 sum score                    | -0.05247 | 0.07037 | -0.19656     | 0.08352  | -0.03232 | -0.746 | 0.456  |
| Total     | VitD3 $\Rightarrow$ PHQ-8 sum score                  | -0.09431 | 0.03650 | -0.16585     | -0.02277 | -0.13199 | -2.584 | 0.010  |
|           | sex1 $\Rightarrow$ PHQ-8 sum score                   | -0.43575 | 0.58623 | -1.58474     | 0.71325  | -0.03831 | -0.743 | 0.457  |
|           | age $\Rightarrow$ PHQ-8 sum score                    | 0.09087  | 0.04495 | 0.00277      | 0.17898  | 0.09729  | 2.022  | 0.043  |
|           | BMI $\Rightarrow$ PHQ-8 sum score                    | -0.02079 | 0.07949 | -0.17659     | 0.13502  | -0.01280 | -0.261 | 0.794  |

Note. Confidence intervals computed with method: Bootstrap percentiles

Note. Betas are completely standardized effect sizes
