# Supplementary material for: The Mediation Role of Sleep Disturbances between Vitamin D and Depressive Symptoms: A Cross-Sectional Study
Source: MDPI journal article supplement (doi:10.3390/brainsci13111501), 2023-10-24
Supplement: s1 [file s1]

## Indirect and Total Effects

| Type      | Effect                                                 | Estimate | SE      | 95% C.I. (a) |          | $\beta$  | z       | p     |
|-----------|--------------------------------------------------------|----------|---------|--------------|----------|----------|---------|-------|
|           |                                                        |          |         | Lower        | Upper    |          |         |       |
| Indirect  | VitD3 $\Rightarrow$ H4 $\Rightarrow$ HAMD-14 sum score | -0.03848 | 0.01437 | -0.06880     | -0.01278 | -0.04642 | -2.6777 | 0.007 |
|           | VitD3 $\Rightarrow$ H5 $\Rightarrow$ HAMD-14 sum score | -0.00442 | 0.00526 | -0.01656     | 0.00454  | -0.00533 | -0.8401 | 0.401 |
|           | VitD3 $\Rightarrow$ H6 $\Rightarrow$ HAMD-14 sum score | -0.00272 | 0.00804 | -0.01909     | 0.01336  | -0.00328 | -0.3380 | 0.735 |
|           | age $\Rightarrow$ H4 $\Rightarrow$ HAMD-14 sum score   | -5.53e-4 | 0.01495 | -0.02898     | 0.03033  | -5.10e-4 | -0.0370 | 0.971 |
|           | age $\Rightarrow$ H5 $\Rightarrow$ HAMD-14 sum score   | 0.00344  | 0.00480 | -0.00406     | 0.01496  | 0.00318  | 0.7168  | 0.473 |
|           | age $\Rightarrow$ H6 $\Rightarrow$ HAMD-14 sum score   | 0.03191  | 0.01364 | 0.00954      | 0.06219  | 0.02944  | 2.3385  | 0.019 |
|           | BMI $\Rightarrow$ H4 $\Rightarrow$ HAMD-14 sum score   | 0.05456  | 0.02971 | 4.23e-6      | 0.11838  | 0.02897  | 1.8363  | 0.066 |
|           | BMI $\Rightarrow$ H5 $\Rightarrow$ HAMD-14 sum score   | -0.00477 | 0.00796 | -0.02374     | 0.00936  | -0.00253 | -0.5992 | 0.549 |
|           | BMI $\Rightarrow$ H6 $\Rightarrow$ HAMD-14 sum score   | -0.00890 | 0.01718 | -0.04291     | 0.02650  | -0.00472 | -0.5181 | 0.604 |
|           | sex1 $\Rightarrow$ H4 $\Rightarrow$ HAMD-14 sum score  | -0.09903 | 0.21682 | -0.54931     | 0.32350  | -0.00750 | -0.4567 | 0.648 |
|           | sex1 $\Rightarrow$ H5 $\Rightarrow$ HAMD-14 sum score  | 0.03850  | 0.06023 | -0.05591     | 0.18765  | 0.00292  | 0.6391  | 0.523 |
|           | sex1 $\Rightarrow$ H6 $\Rightarrow$ HAMD-14 sum score  | -0.21588 | 0.14161 | -0.52493     | 0.03635  | -0.01636 | -1.5245 | 0.127 |
| Component | VitD3 $\Rightarrow$ H4                                 | -0.01952 | 0.00642 | -0.03180     | -0.00695 | -0.15915 | -3.0405 | 0.002 |
|           | H4 $\Rightarrow$ HAMD-14 sum score                     | 1.97179  | 0.34029 | 1.32164      | 2.64320  | 0.29168  | 5.7944  | <.001 |
|           | VitD3 $\Rightarrow$ H5                                 | -0.01147 | 0.00555 | -0.02288     | -7.47e-4 | -0.10672 | -2.0672 | 0.039 |
|           | H5 $\Rightarrow$ HAMD-14 sum score                     | 0.38487  | 0.37472 | -0.35320     | 1.10678  | 0.04991  | 1.0271  | 0.304 |
|           | VitD3 $\Rightarrow$ H6                                 | -0.00197 | 0.00571 | -0.01296     | 0.00956  | -0.01713 | -0.3446 | 0.730 |
|           | H6 $\Rightarrow$ HAMD-14 sum score                     | 1.38196  | 0.34182 | 0.71225      | 2.04201  | 0.19145  | 4.0430  | <.001 |
|           | age $\Rightarrow$ H4                                   | -2.80e-4 | 0.00747 | -0.01427     | 0.01503  | -0.00175 | -0.0375 | 0.970 |
|           | age $\Rightarrow$ H5                                   | 0.00895  | 0.00628 | -0.00255     | 0.02207  | 0.06368  | 1.4245  | 0.154 |
|           | age $\Rightarrow$ H6                                   | 0.02309  | 0.00775 | 0.00847      | 0.03871  | 0.15378  | 2.9799  | 0.003 |
|           | BMI $\Rightarrow$ H4                                   | 0.02767  | 0.01394 | 2.27e-6      | 0.05489  | 0.09931  | 1.9845  | 0.047 |
|           | BMI $\Rightarrow$ H5                                   | -0.01239 | 0.01262 | -0.03617     | 0.01321  | -0.05074 | -0.9821 | 0.326 |
|           | BMI $\Rightarrow$ H6                                   | -0.00644 | 0.01214 | -0.02959     | 0.01839  | -0.02468 | -0.5306 | 0.596 |
|           | sex1 $\Rightarrow$ H4                                  | -0.05022 | 0.10727 | -0.26330     | 0.16081  | -0.02573 | -0.4682 | 0.640 |
|           | sex1 $\Rightarrow$ H5                                  | 0.10003  | 0.08869 | -0.07327     | 0.28081  | 0.05845  | 1.1278  | 0.259 |
|           | sex1 $\Rightarrow$ H6                                  | -0.15621 | 0.09284 | -0.33719     | 0.02789  | -0.08545 | -1.6825 | 0.092 |
| Direct    | VitD3 $\Rightarrow$ HAMD-14 sum score                  | -0.05330 | 0.04133 | -0.13592     | 0.02804  | -0.06430 | -1.2897 | 0.197 |
|           | age $\Rightarrow$ HAMD-14 sum score                    | 0.00380  | 0.05033 | -0.10176     | 0.09774  | 0.00351  | 0.0755  | 0.940 |
|           | BMI $\Rightarrow$ HAMD-14 sum score                    | -0.09375 | 0.09229 | -0.27642     | 0.08956  | -0.04978 | -1.0159 | 0.310 |

Note. Confidence intervals computed with method: Bootstrap percentiles

Note. Betas are completely standardized effect sizes

## Indirect and Total Effects

| Type  | Effect                                | Estimate | SE      | 95% C.I. (a) |          | $\beta$  | z       | p     |
|-------|---------------------------------------|----------|---------|--------------|----------|----------|---------|-------|
|       |                                       |          |         | Lower        | Upper    |          |         |       |
| Total | sex1 $\Rightarrow$ HAMD-14 sum score  | -0.01754 | 0.62904 | -1.24508     | 1.20693  | -0.00133 | -0.0279 | 0.978 |
|       | VitD3 $\Rightarrow$ HAMD-14 sum score | -0.09892 | 0.04334 | -0.18386     | -0.01398 | -0.11718 | -2.2827 | 0.022 |
|       | age $\Rightarrow$ HAMD-14 sum score   | 0.03860  | 0.05337 | -0.06600     | 0.14320  | 0.03498  | 0.7232  | 0.470 |
|       | BMI $\Rightarrow$ HAMD-14 sum score   | -0.05287 | 0.09438 | -0.23784     | 0.13211  | -0.02756 | -0.5602 | 0.575 |
|       | sex1 $\Rightarrow$ HAMD-14 sum score  | -0.29395 | 0.69598 | -1.65805     | 1.07015  | -0.02187 | -0.4224 | 0.673 |

Note. Confidence intervals computed with method: Bootstrap percentiles

Note. Betas are completely standardized effect sizes
